# Supplementary material for: Lamin regulates the dietary restriction response via the mTOR pathway in Caenorhabditis elegans
Source: PubMed Central journal article supplement (PMC8445603; doi:10.1242/jcs.258428), 2021-09-06
Supplement: joces-134-258428-s1.pdf [file joces-134-258428-s1.pdf]

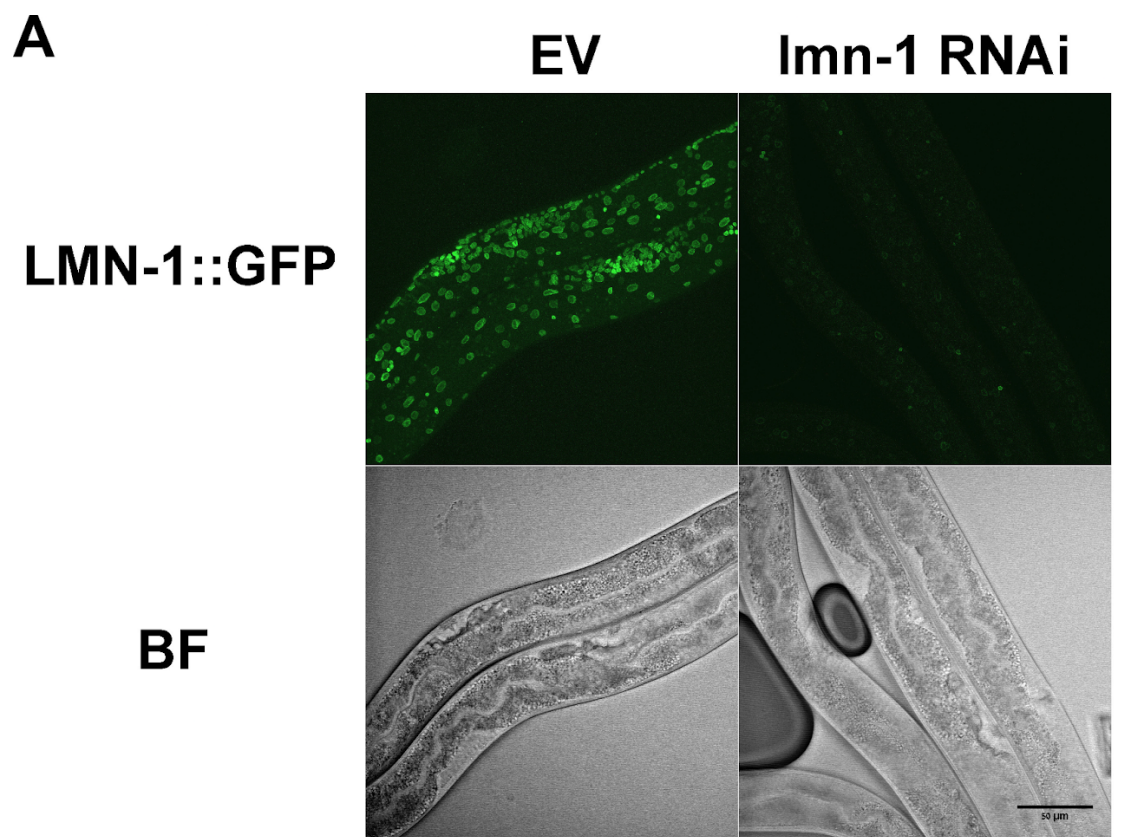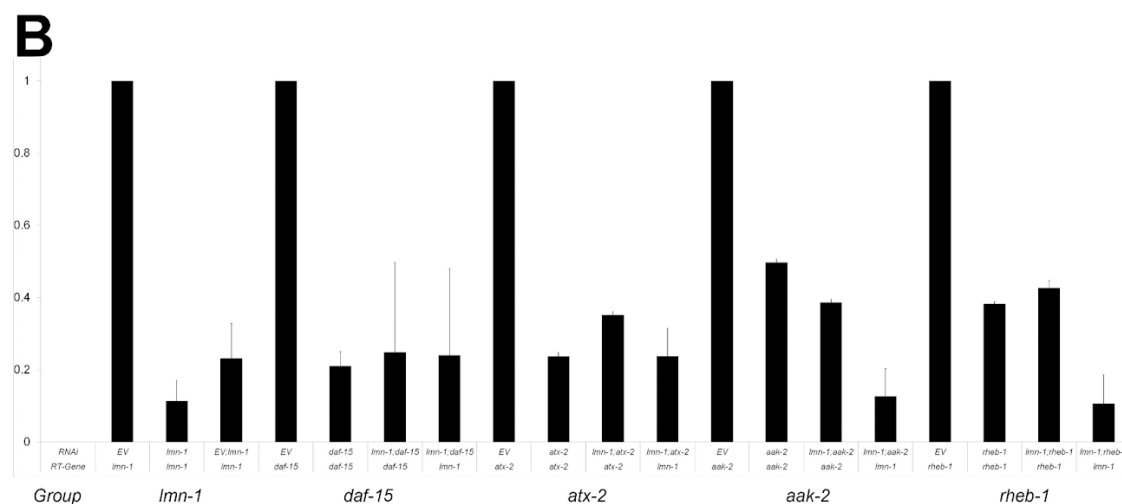

**Fig. S1.** (A) *Imn-1*(RNAi) successfully downregulated lamin, as evident from confocal microscopy of LMN-1::GFP animals. (B) Real time PCR quantification of gene levels following RNAi.

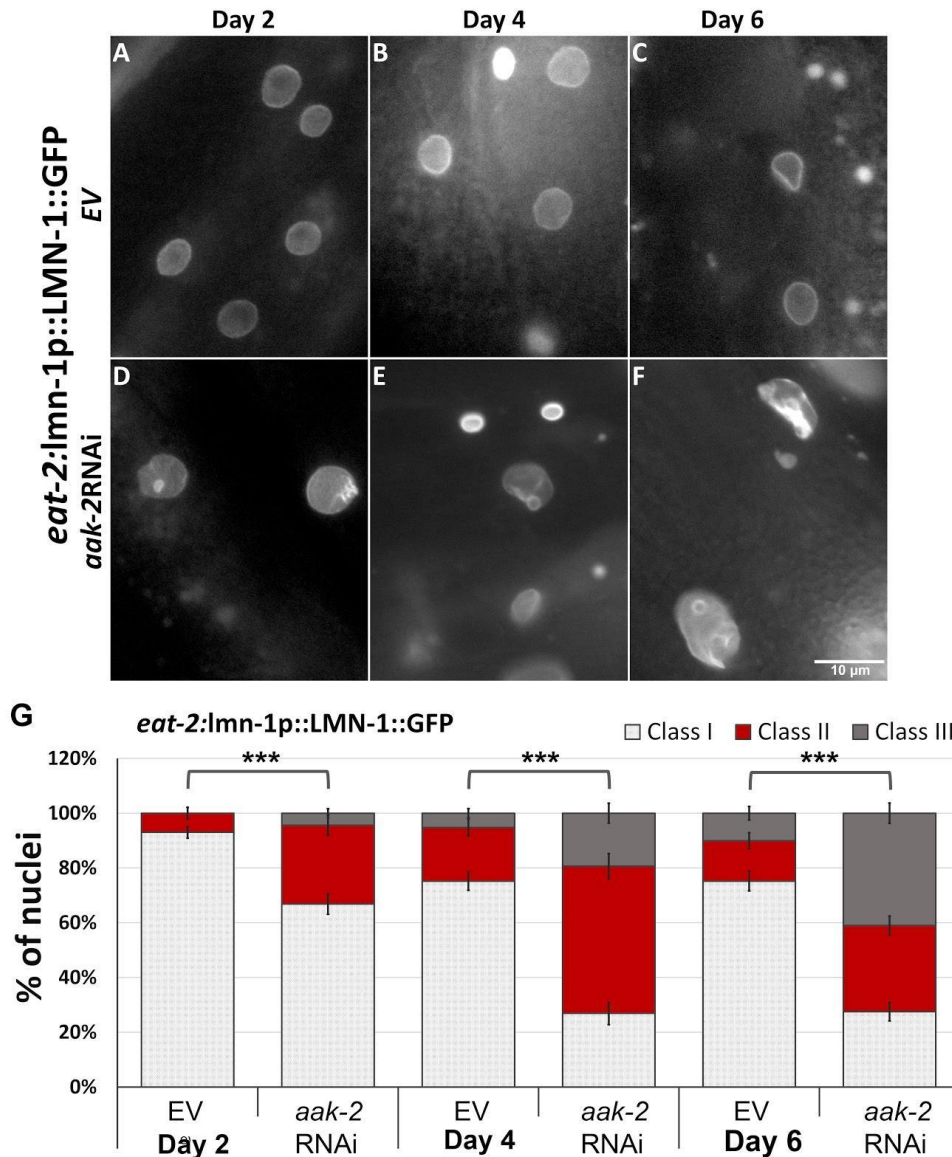

**Fig. S2.** AAK-2 is required to maintain nuclear structure (A-F) Microscope images of *eat-2* worms expressing LMN-1::GFP fed by either EV (A-C) or *aak-2* (RNAi) post-hatching (D-F) at day 2 (A,D), 4 (B,E) and 6 (C,F) of adulthood. (G) Relative distribution of the 3 different classes grading the nuclear morphology changes in *eat-2* worms expressing LMN-1::GFP fed with *aak-2* (RNAi) or EV at days 2,4 and 6 of adulthood. n(D2)=303 nuclei, n(D4)=292 nuclei, n(D6)=327 nuclei. Error bars in all graphs represent mean  $\pm$  SEM. P value was calculated using Fisher Exact Probability Test.

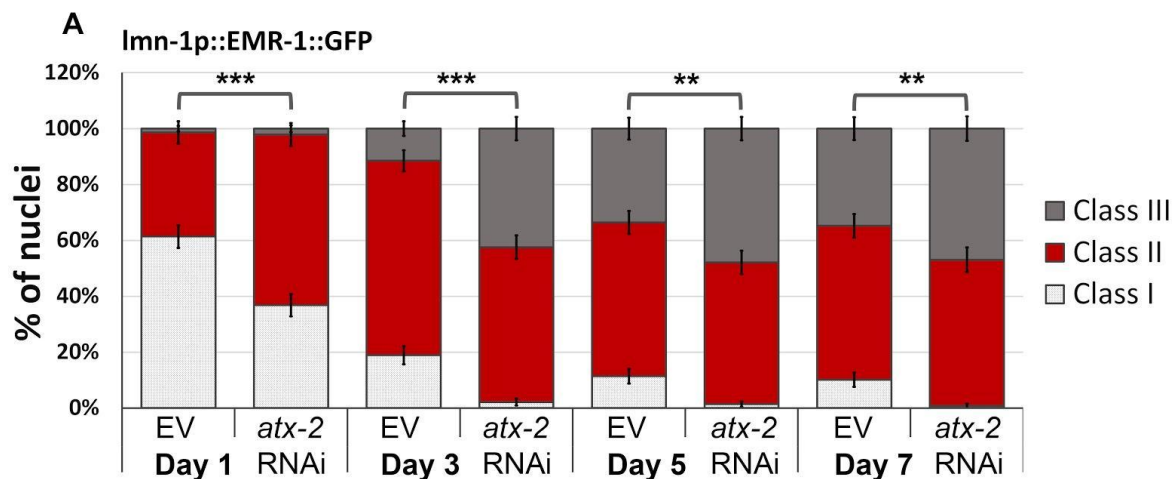

**Fig. S3.** ATX-2 is required to maintain nuclear structure. Relative distribution of the 3 different classes grading the nuclear morphology changes in EMR-1::GFP expressing worms fed with *atx-2* or EV at days 1, 3, 5 and 7 of adulthood. n(D1)=289 nuclei, n(D3)=287 nuclei, n(D5)=291 nuclei, n(D7)=268 nuclei. Error bars in all graphs represent mean  $\pm$  SEM. P value was calculated using Fisher Exact Probability Test.

**Table S1.** Primer pairs used for real-time PCR.

| Name             | Sequence                  |
|------------------|---------------------------|
| <i>lmn-1 F1</i>  | AACTTGGCCGATCGCTTC        |
| <i>lmn-1 R1</i>  | GAGCTCATCTTGAGCCGAAT      |
| <i>lmn-1 F2</i>  | TCGCTAAGCAACAATGGAGG      |
| <i>lmn-1 R2</i>  | GCGAATTTGAACCTGGAGTC      |
| <i>atx-2 F1</i>  | GCAGCAGCAACACATTCAAC      |
| <i>atx-2 R1</i>  | TCTGTTGCATTGGCATCTGT      |
| <i>atx-2 F2</i>  | AGTATATGGTGATGCAGGGAC     |
| <i>atx-2 R2</i>  | CGCTCGCCATAAAGACTTTG      |
| <i>daf-15 F1</i> | GGCGATTCATGCAATGGAAG      |
| <i>daf-15 R1</i> | GGCAGAATGGATTGAAGC        |
| <i>daf-15 F2</i> | GCTCGATCGCTAACCACTTC      |
| <i>daf-15 R2</i> | TTGGCGGATAATTGTCATCA      |
| <i>rheb-1 F1</i> | AGATCACGGCCAGAGAATCG      |
| <i>rheb-1 R1</i> | TCTCACGGAGAAGCAATTCG      |
| <i>rheb-1 F2</i> | AATGGGATGCGAAGTTTGTC      |
| <i>rheb-1 R2</i> | TTCGAACACCTCATGCACTC      |
| <i>aak-2 F1</i>  | CAAGAGTTTGGCCGACGAGG      |
| <i>aak-2 R1</i>  | TGATGCGTGTCGGGATGAAG      |
| <i>aak-2 F2</i>  | TTGTTGGATTTCAAGAGTTTGG    |
| <i>aak-2 R2</i>  | TTCTGCGGCATAGACATTGA      |
| <i>pmp-3 F</i>   | gttcccgtgttcatcactcat     |
| <i>pmp-3 R</i>   | acaccgtcgagaagctgtaga     |
| <i>act-1 F1</i>  | gctggacgtgatcttactgattacc |
| <i>act-1 R1</i>  | gtagcagagcttctccttgatgc   |
